# Supplementary material
Source: PubMed Central journal article supplement (PMC5130289)

**Supplementary data:**

**Supplementary Figure 1: Total hemoglobin concentration increase during radiotherapy**

Early increases of the mean baseline-corrected total vascular hemoglobin concentration (f-[THb]) for the local control and local failure groups suggests that the increase of the overall blood volume or perfusion is as a result of radiotherapy. A similar, increase of the mean f-[THb] in the control group may be related to tumor-directed angiogenesis. The two-degree test for a difference among groups in trajectory across time had a p-value of 0.02.

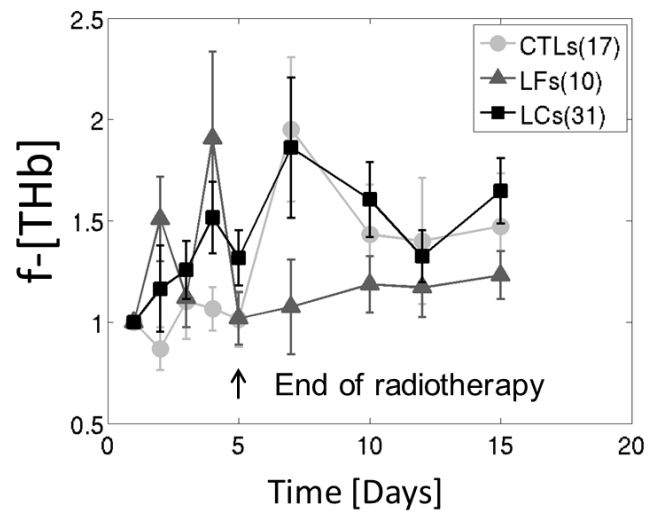

**Supplementary Figure 2: Raw and baseline-corrected oxygen kinetics for each tumor in the 7.5, 9.5, 13.5 Gy and the control groups.**

**A.** The raw oxygenation kinetic for each tumor radiated with 7.5, 9.5, 13.5 Gy and for each control tumor. **B.** The baseline-corrected oxygen kinetic for each tumor radiated with 7.5, 9.5, 13.5 Gy and for each control tumor. Tumors radiated with 13.5 Gy showed higher increases in baseline-corrected  $SO_2\%$  than the control tumors.

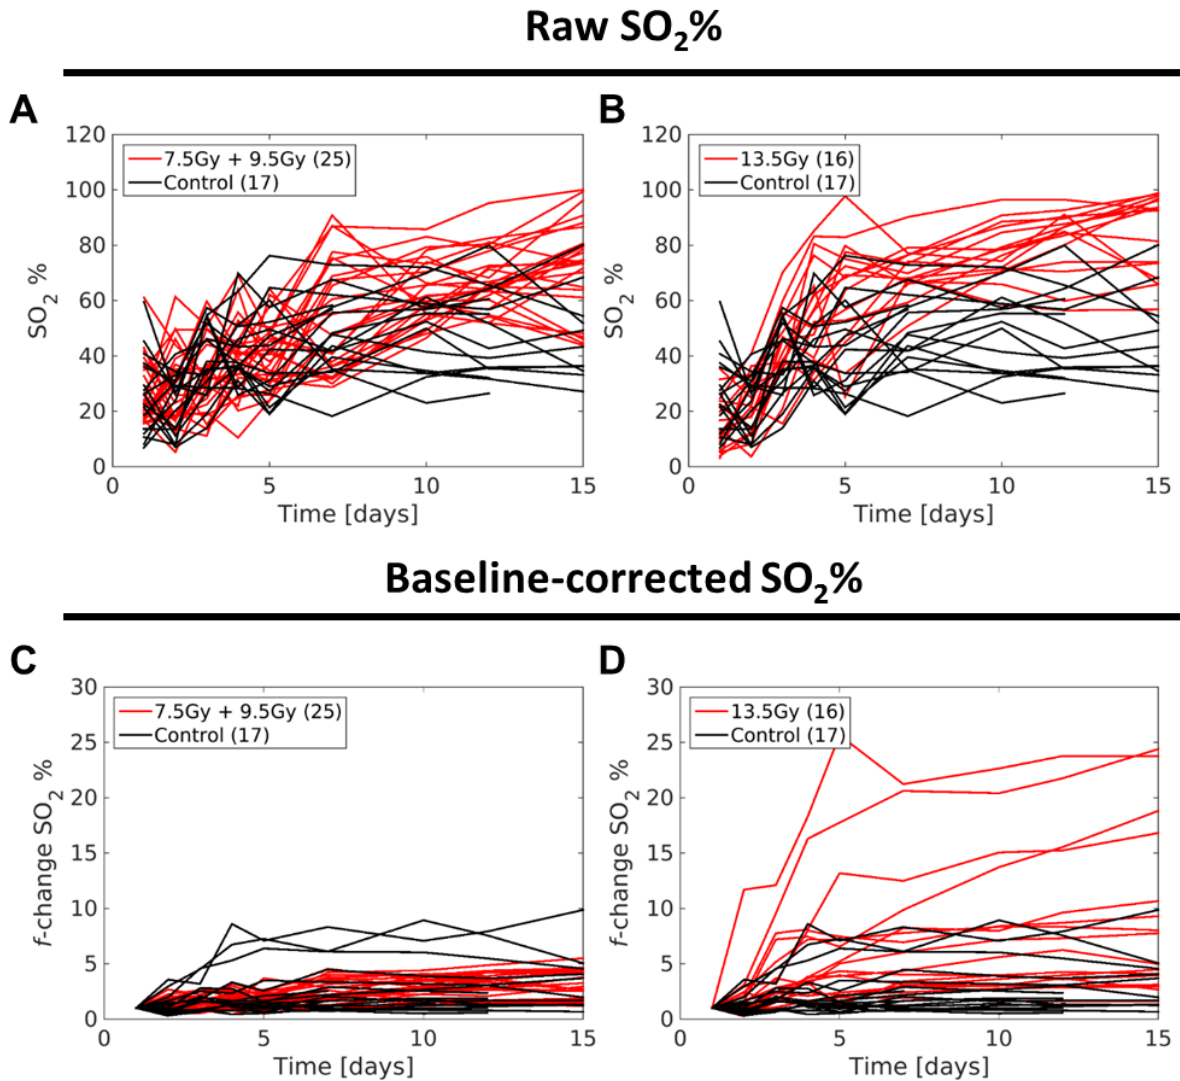

Supplement: NIHMS795533-supplement.pdf [file NIHMS795533-supplement.pdf]
